# Supplementary material for: Adsorption of the Guanine Molecule Over the Pristine, Nb- and Au-doped Boron Nitride Nanosheets: A DFT Study
Source: Research Square preprint supplement (doi:10.21203/rs.3.rs-222751/v1), 2021-02-23
Supplement: Supplementary file 1 [file 094bb9becd22af289288f593.docx]

**Electronic Supporting Information**

Adsorption of the guanine molecule over the pristine, Nb- and Au-doped boron nitride nanosheets: a DFT study

Meryem Derdare, Abdel-Ghani Boudjahem *

Computational Catalysis Group, Laboratory of Applied Chemistry, University of Guelma, Box 401, 24000, Guelma, Algeria

* Author corresponding

E-mail address: [Boudjahem@yahoo.fr](mailto:Boudjahem@yahoo.fr) (A. Boudjahem)

Figure S1. The most stable complexes obtained upon interaction of the guanine molecule with the surface of the NbBN cluster (H, I, J, K and L).

| (H)  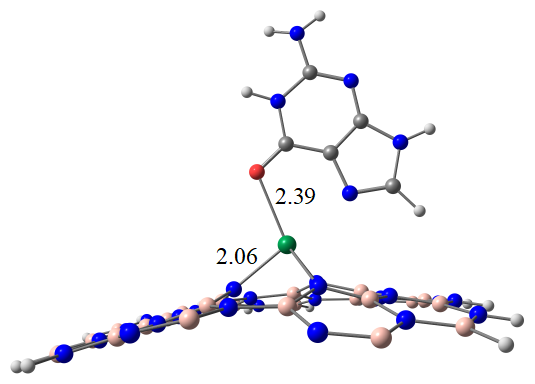 | |
| --- | --- |
| (I)  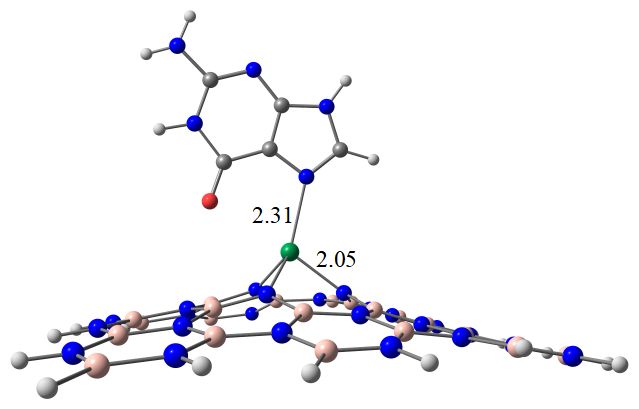 | (J)  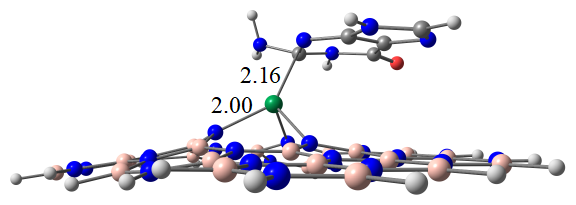 |
| (K)  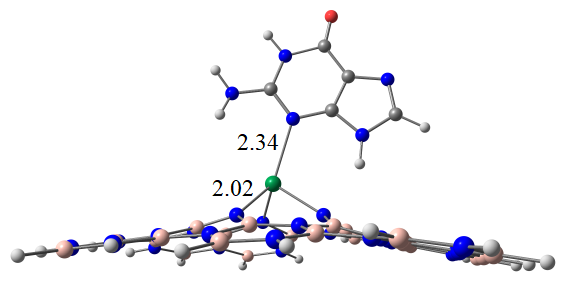 | (L)  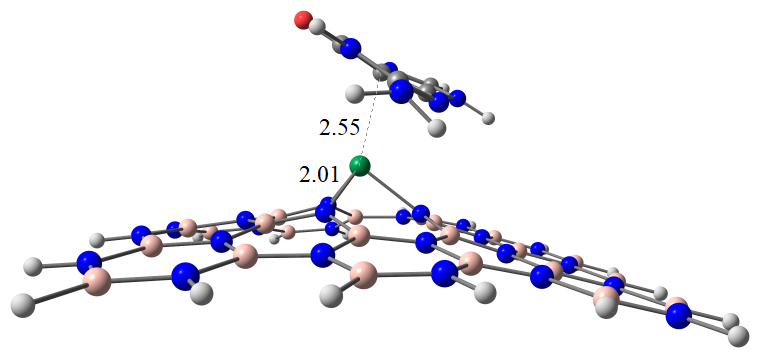 |

Figure S2. Frontier molecular orbitals (FMO) plots of the Nb-doped BN nanosheet and their formed complexes upon interaction with the guanine molecule (H, I, J, K and L).

| HOMO LUMO | |
| --- | --- |
| 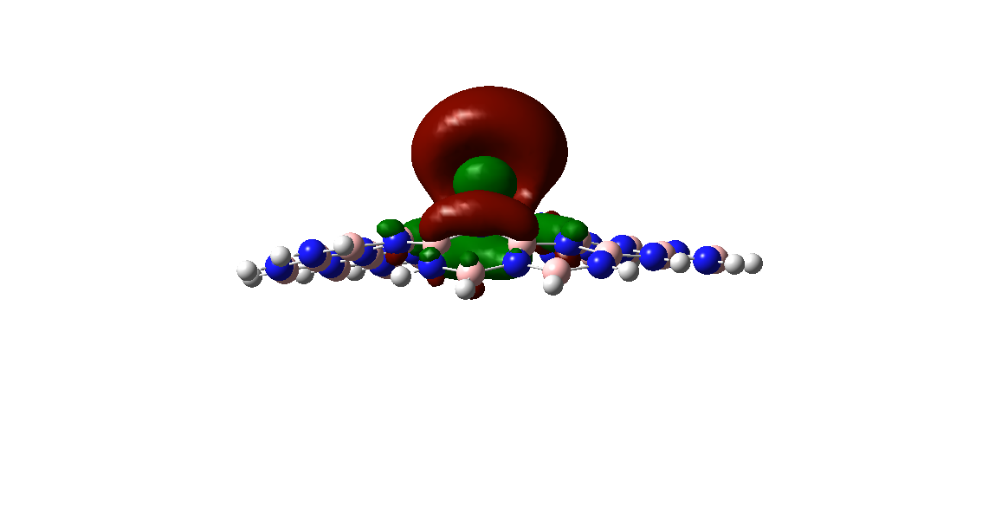 | 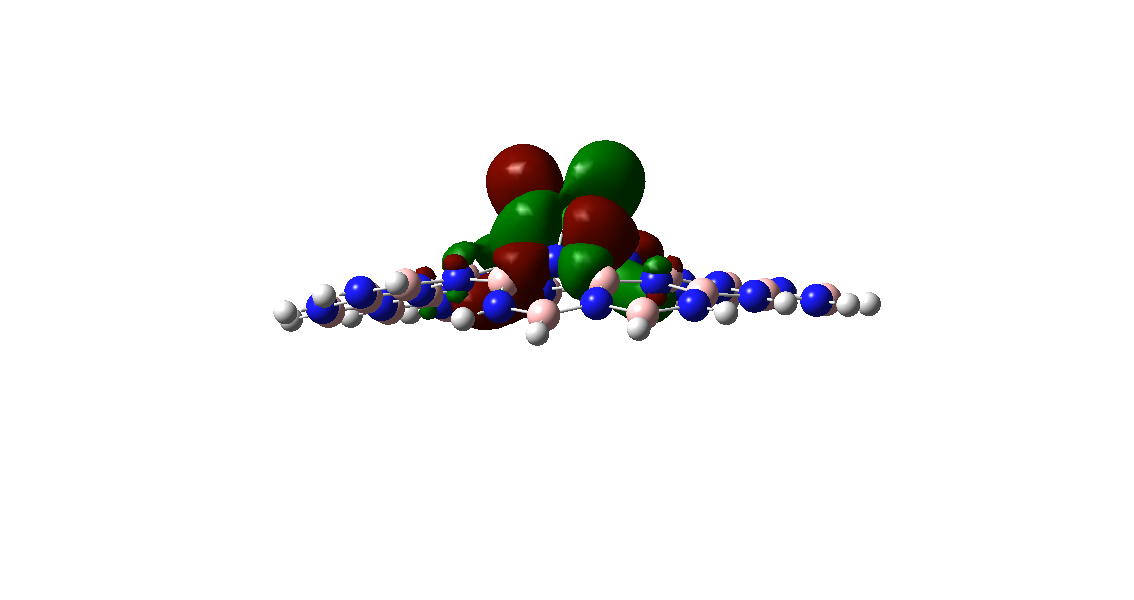 |
| Au-BN | |
| 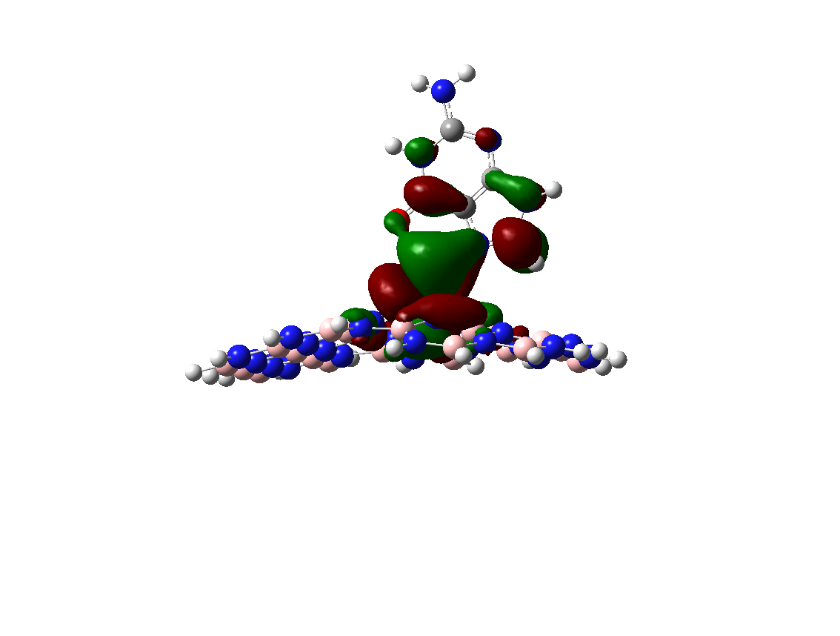 | 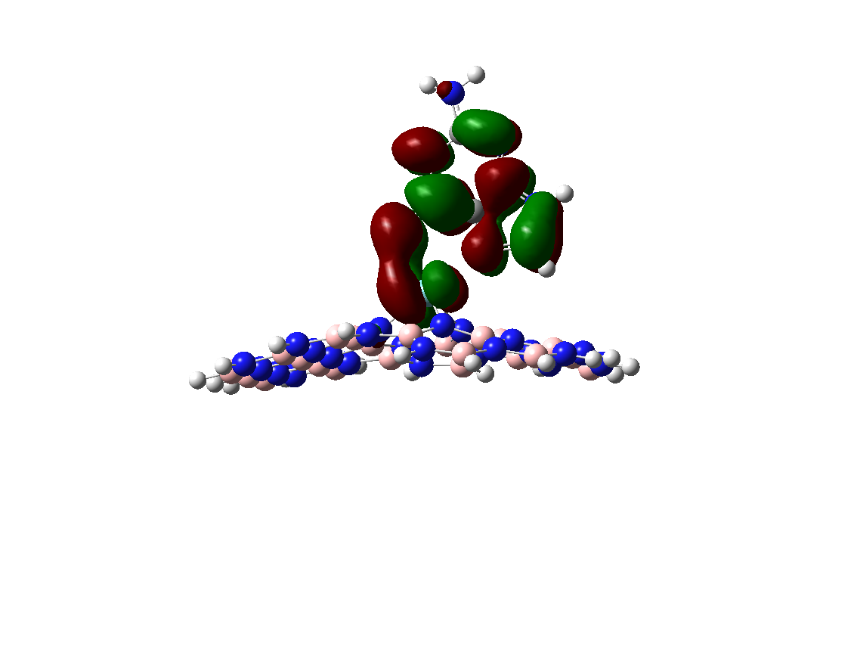 |
| Complex C | |
| 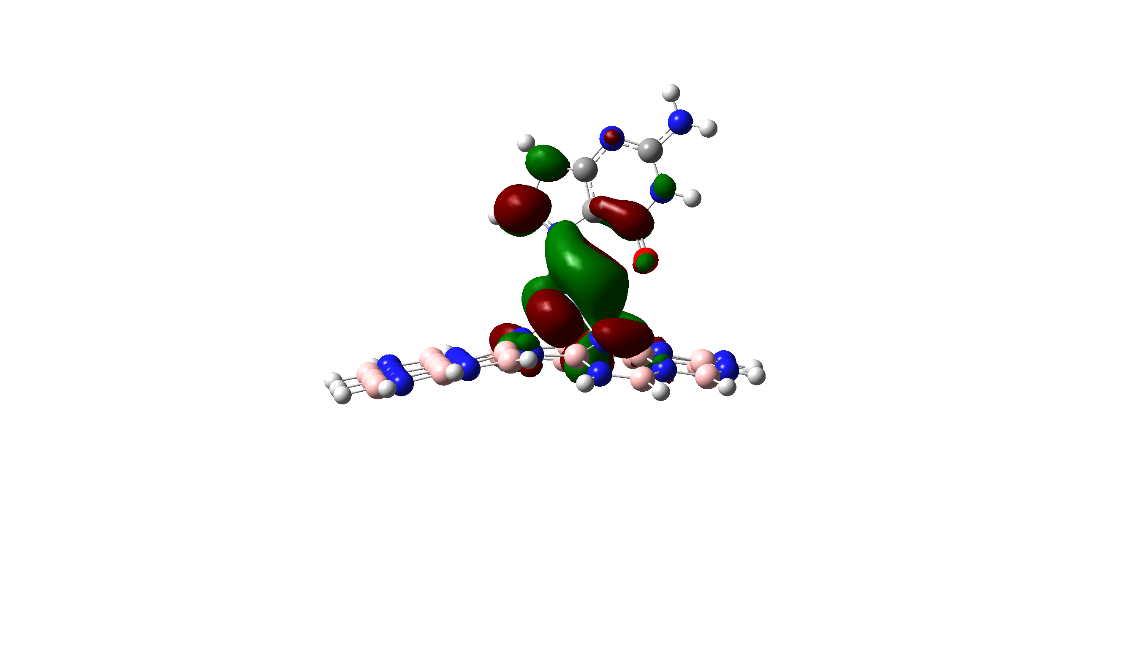 | 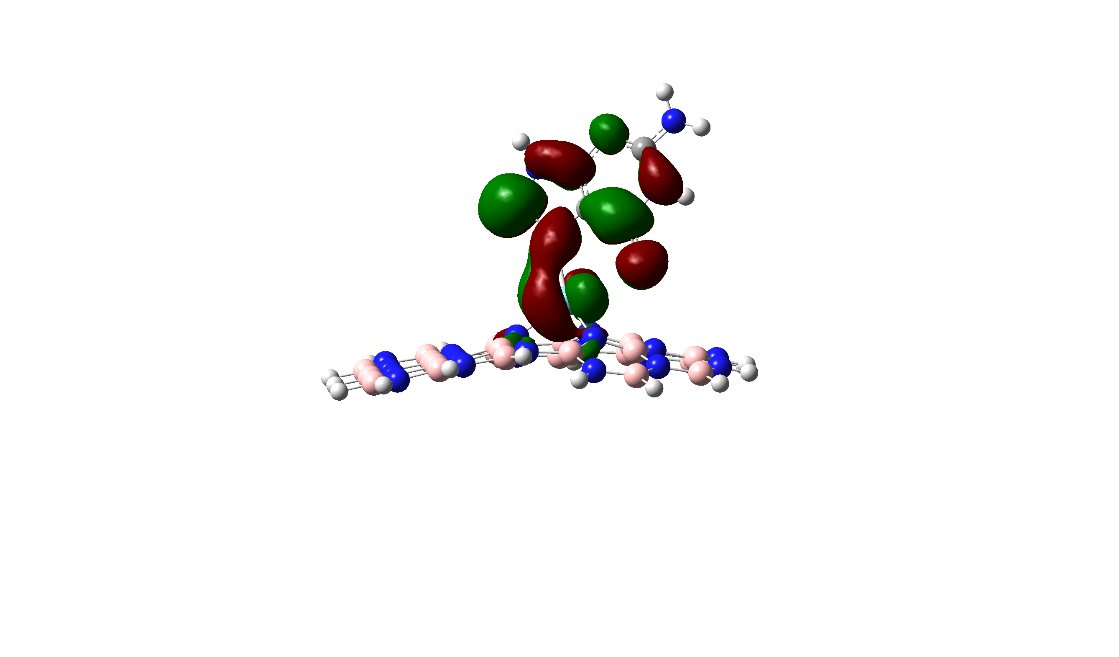 |
| Complex D | |
| 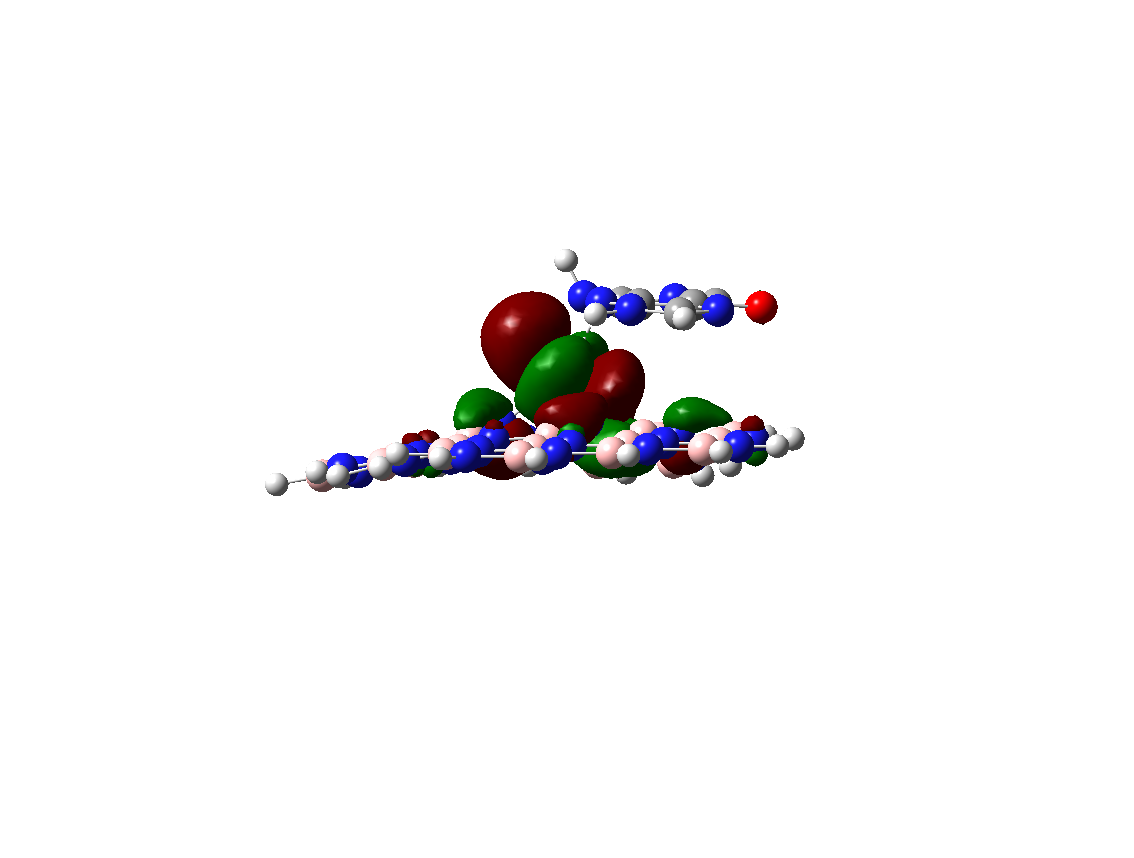 | 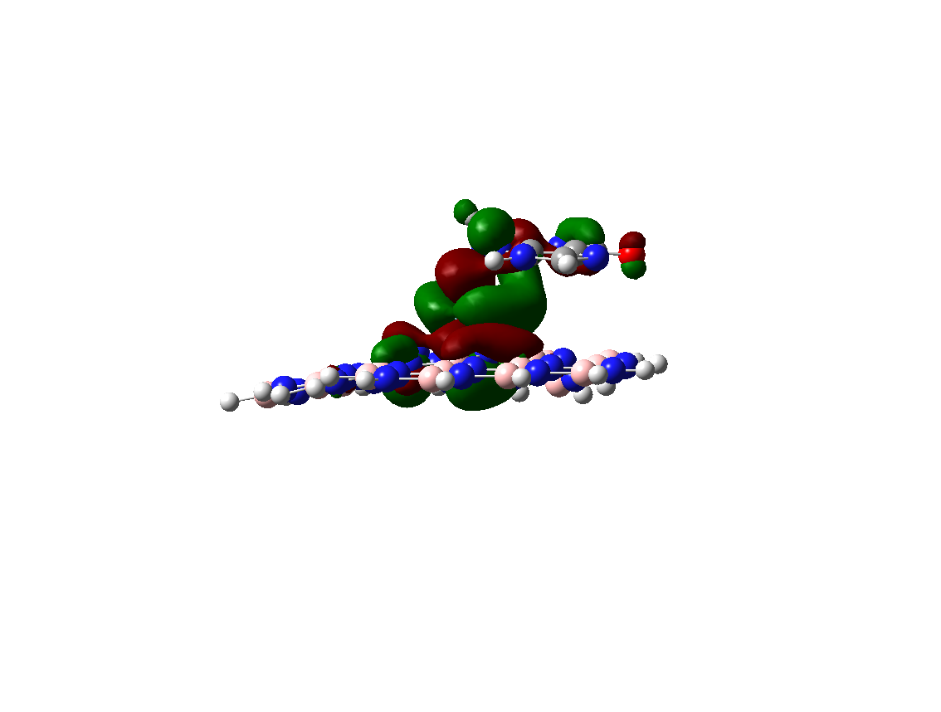 |
| Complex E | |
| 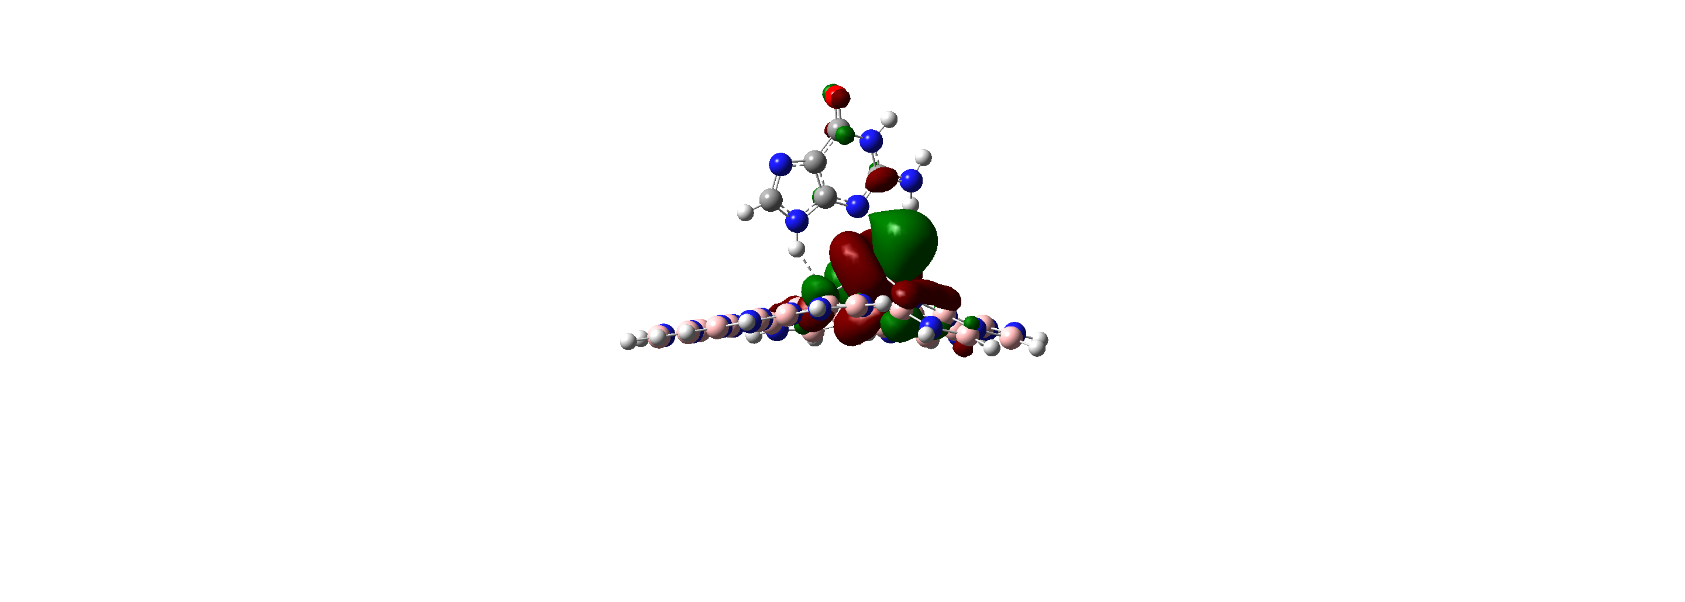 | 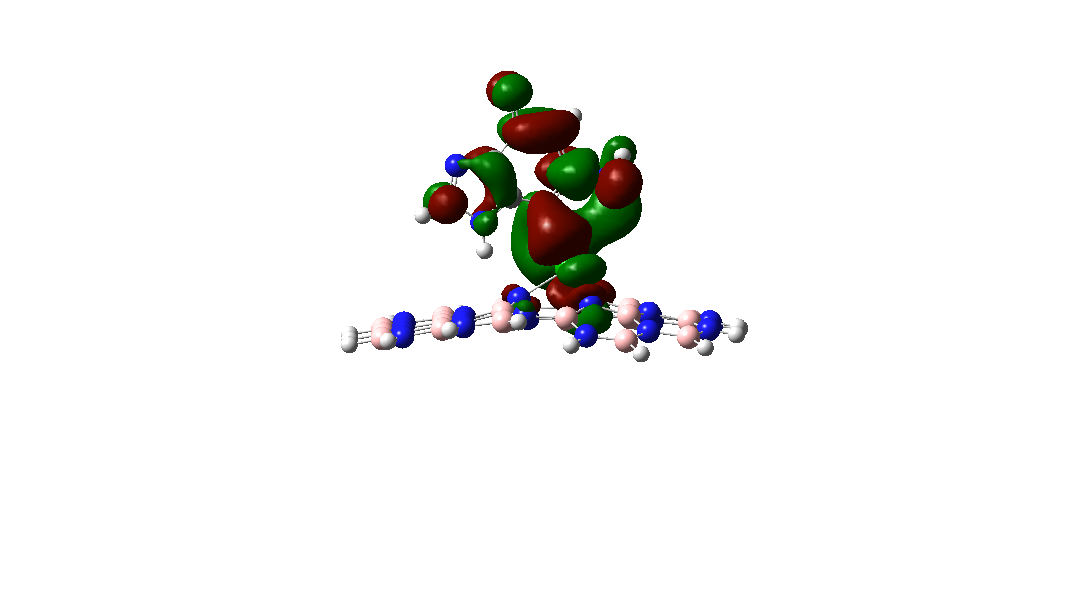 |
| Complex F | |
| 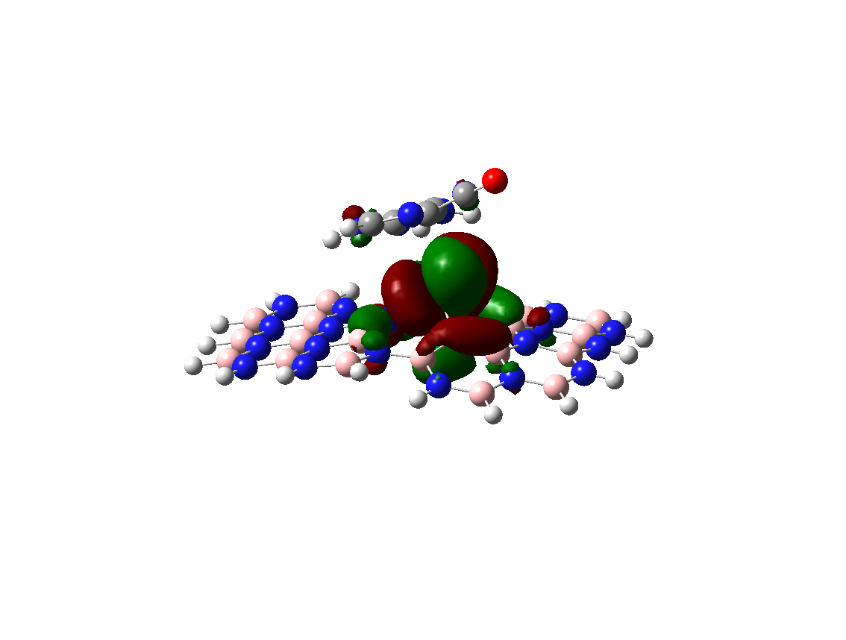 | 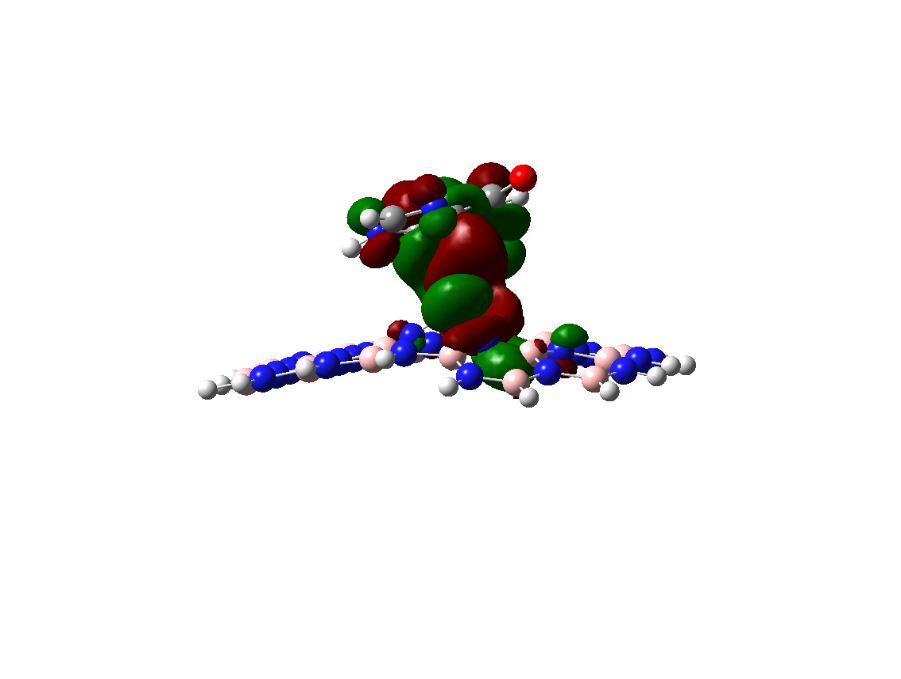 |
| Complex G | |

Figure S3. The electron density difference (EDD) isosurfaces for the complexes H, I, J, K and L.

|  | (H)  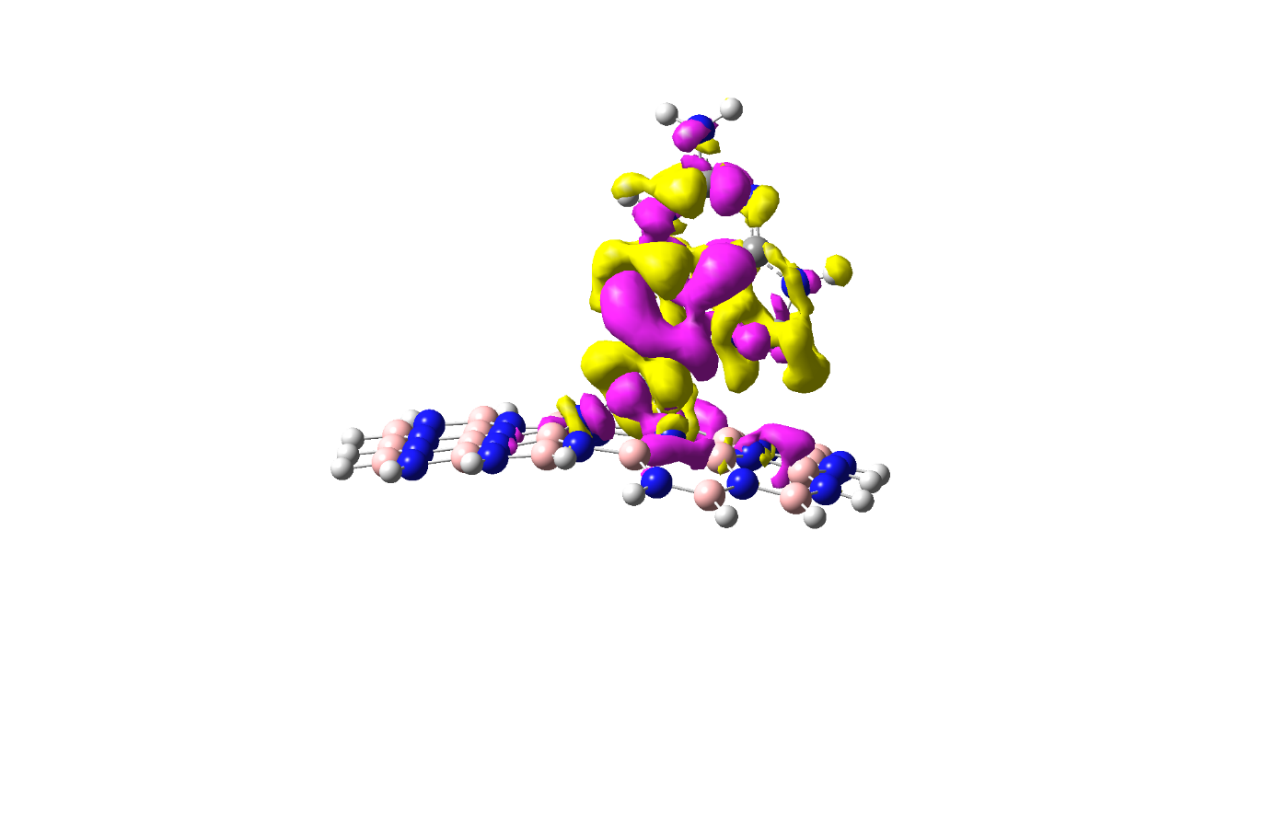 | |  |
| --- | --- | --- | --- |
| (I)  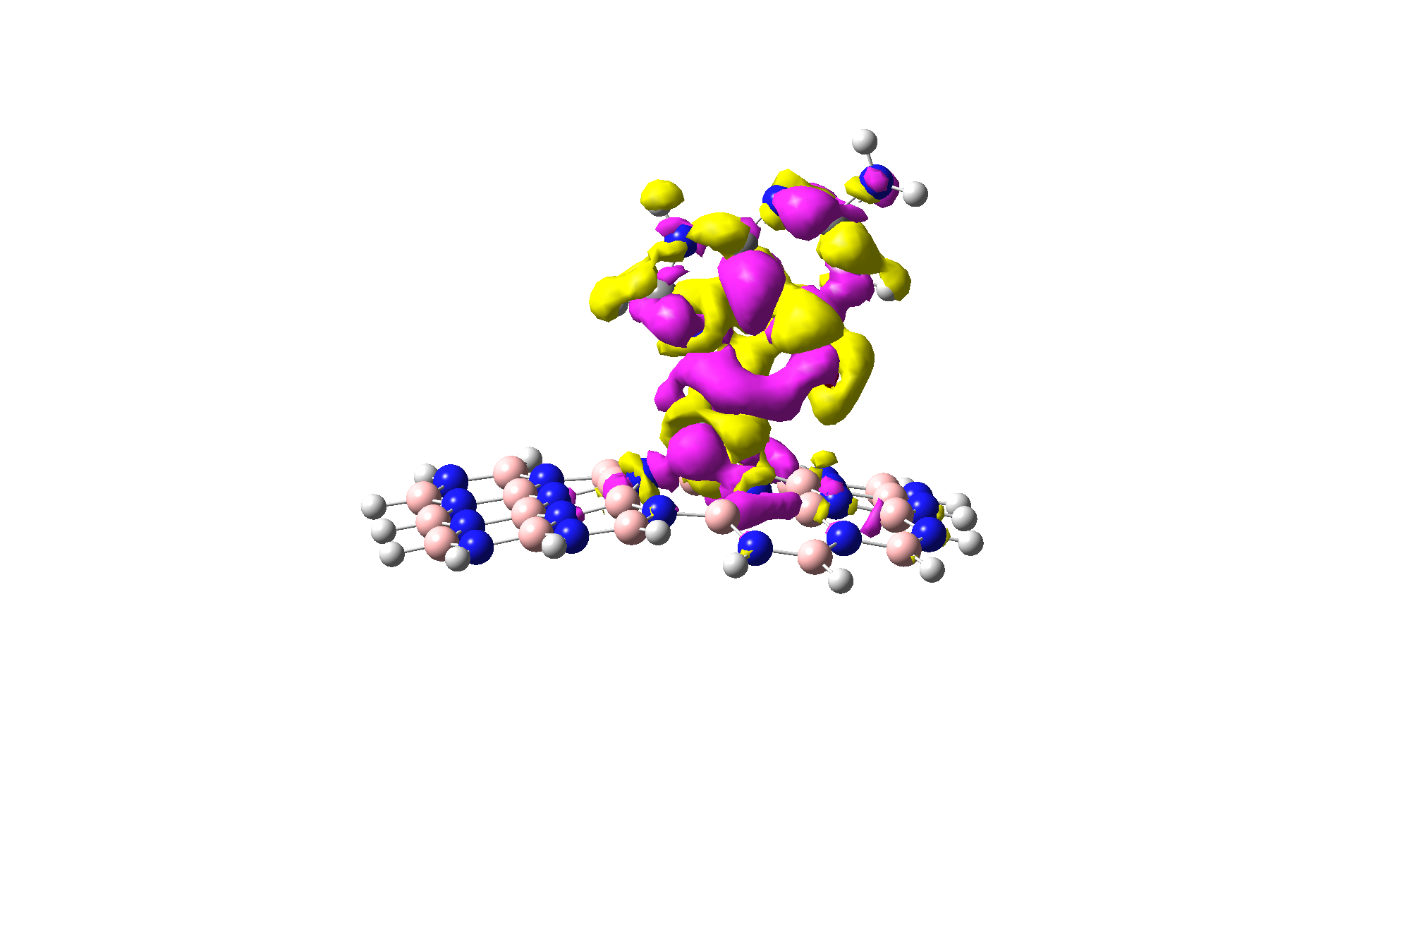 | | (J)  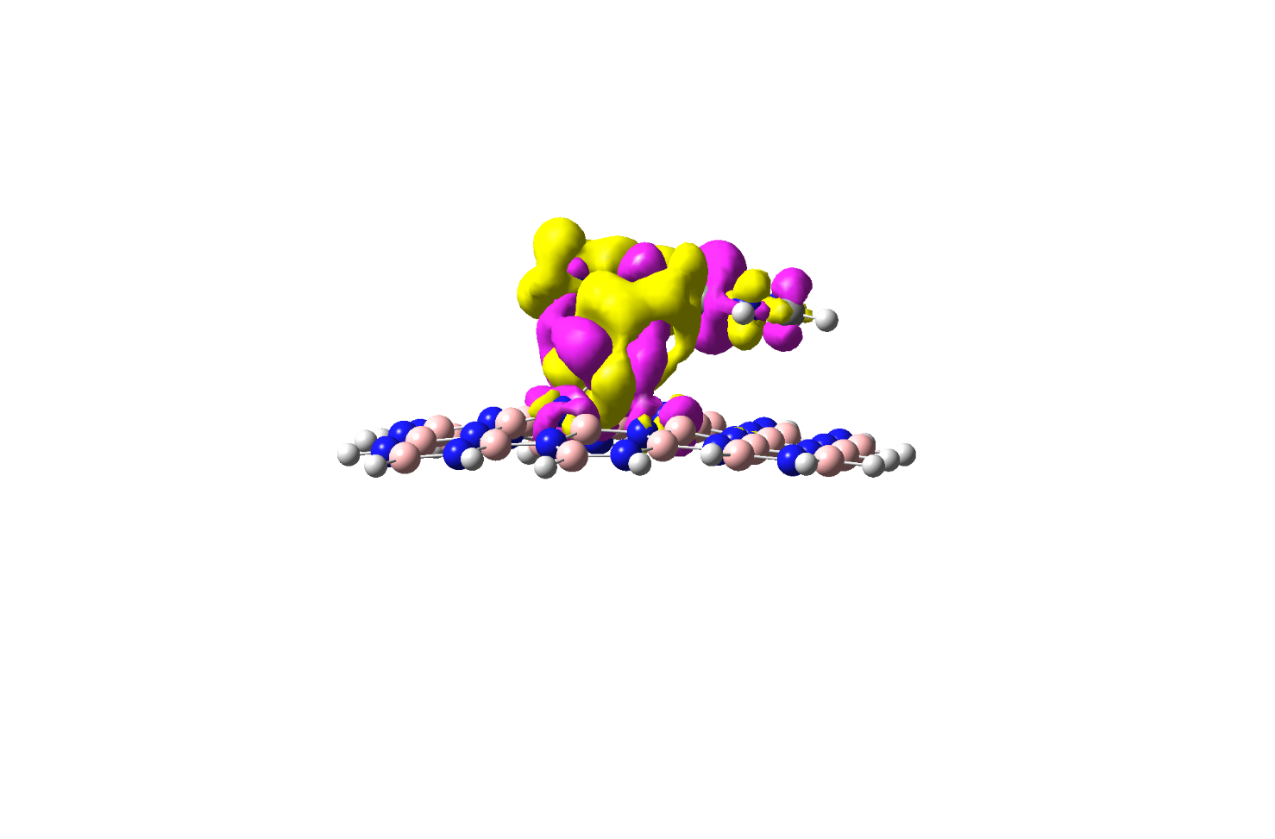 | |
| (K)  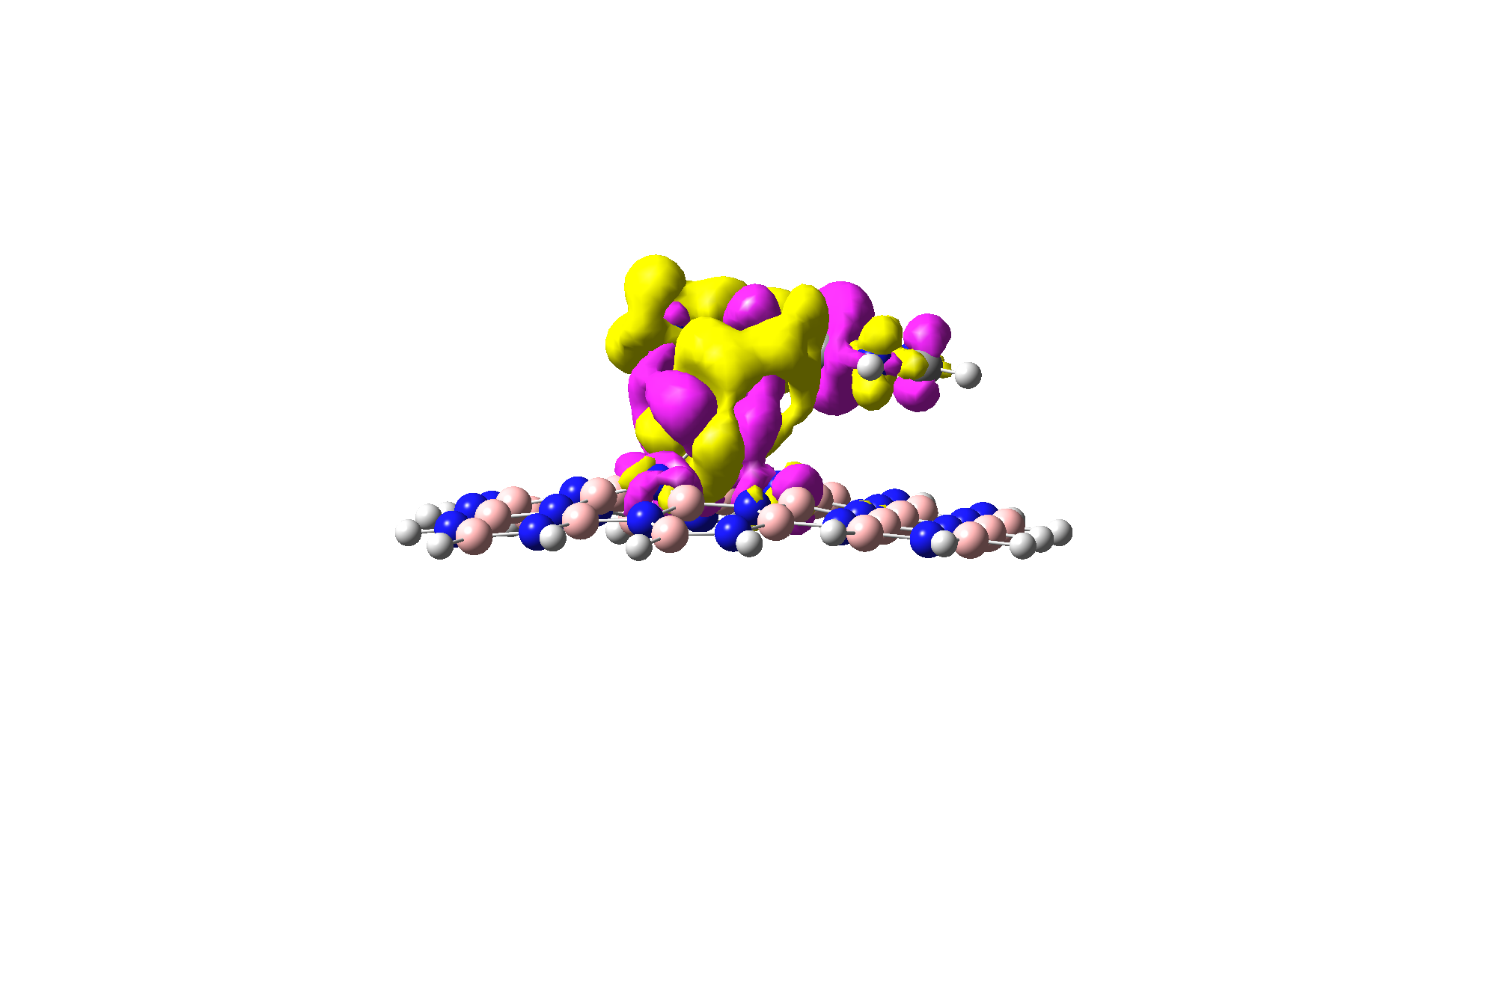 | | (L)  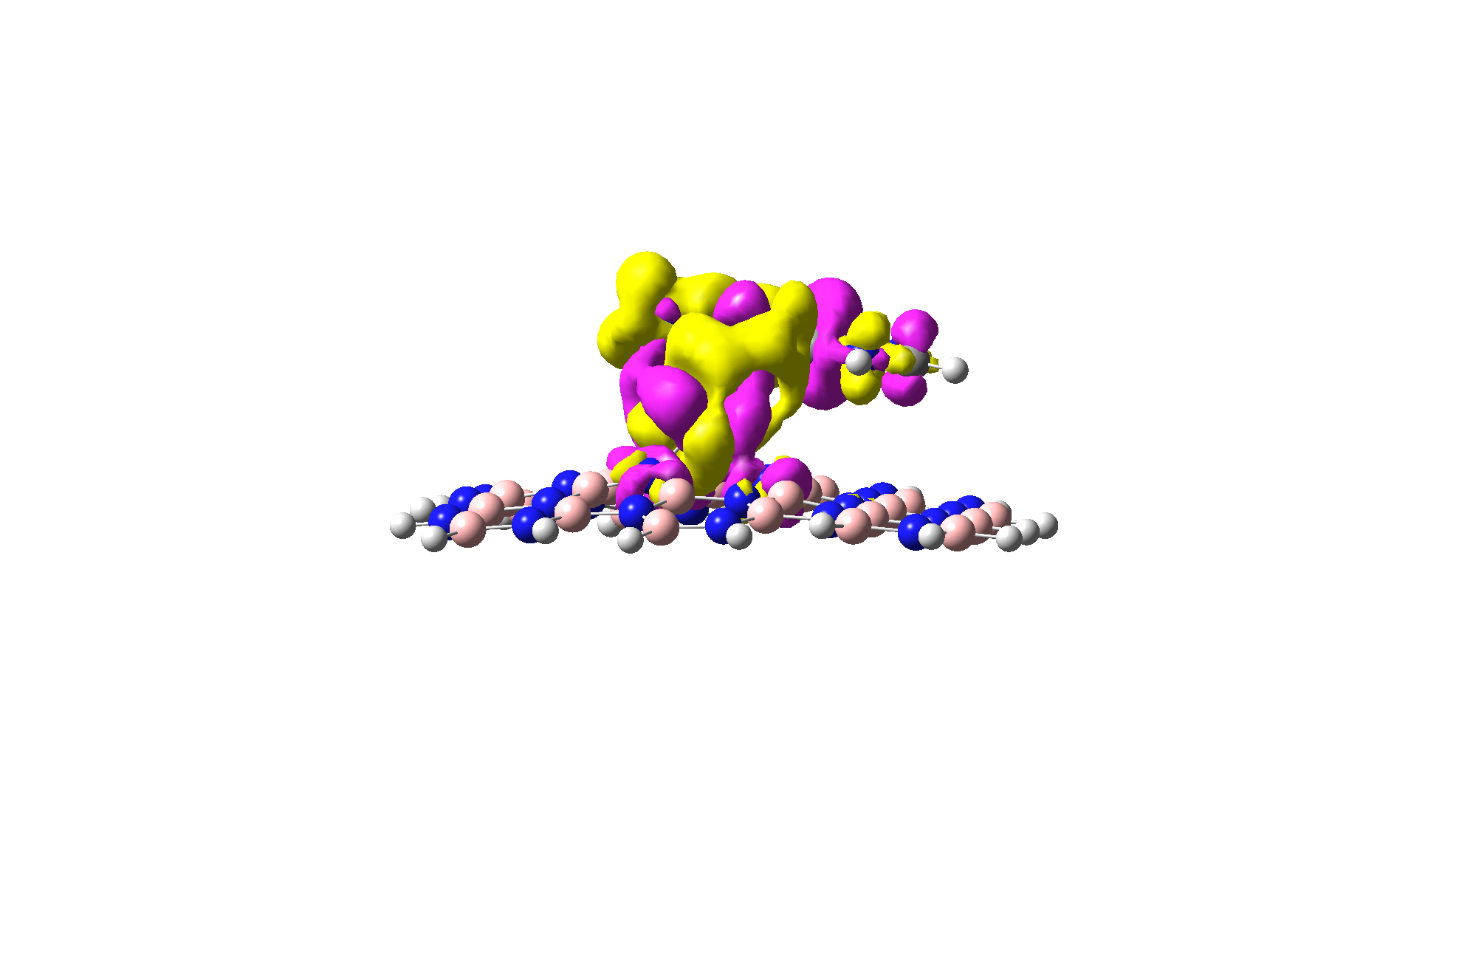 | |
